# Supplementary material
Source: Springer Nature journal article supplement (https://www.springermedizin.de/resource/supplementary/12885_2008_1196_MOESM2_ESM.pdf/9471370)

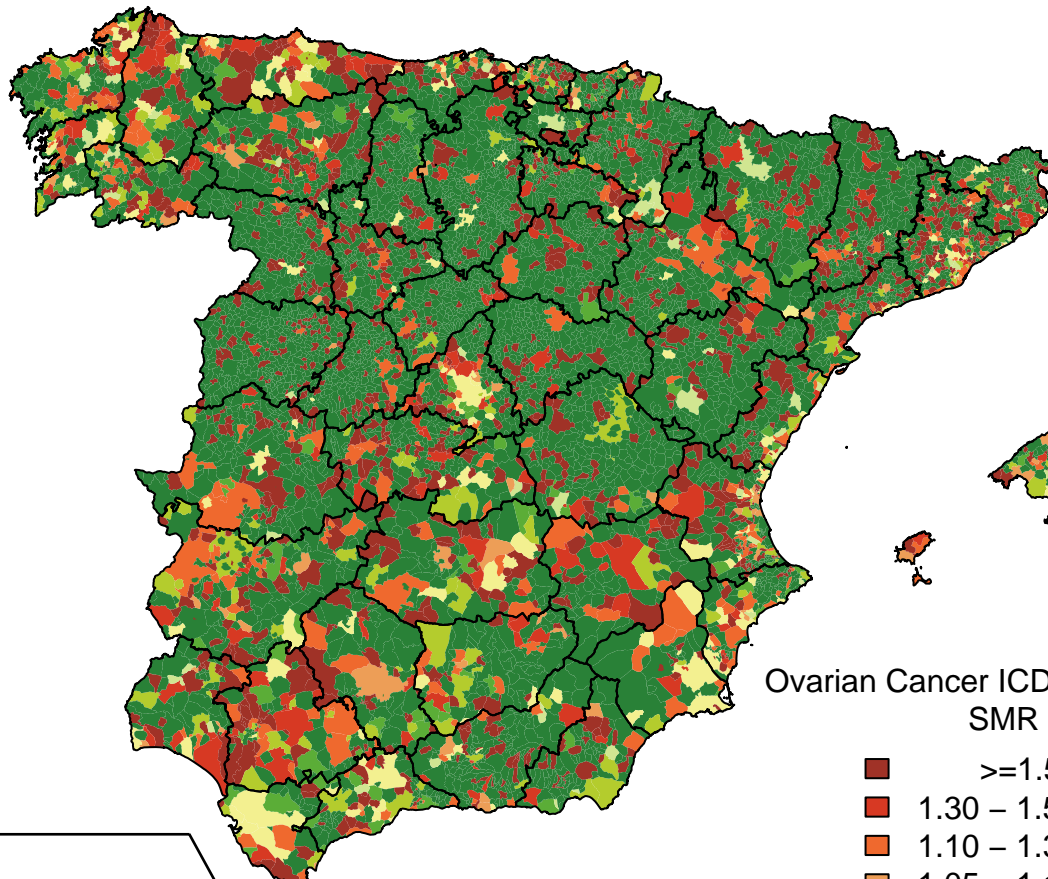

Ovarian Cancer ICD 183 1989–1998  
SMR (towns)

|   |             |        |
|---|-------------|--------|
| ■ | >=1.50      | (1327) |
| ■ | 1.30 – 1.50 | (198)  |
| ■ | 1.10 – 1.30 | (273)  |
| ■ | 1.05 – 1.10 | (67)   |
| ■ | 0.95 – 1.05 | (156)  |
| ■ | 0.91 – 0.95 | (59)   |
| ■ | 0.77 – 0.91 | (188)  |
| ■ | 0.67 – 0.77 | (108)  |
| ■ | < 0.67      | (5829) |

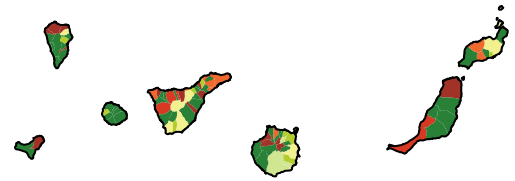

Supplement: MOESM2 [file 9471370]
